# Supplementary material
Source: PubMed Central journal article supplement (PMC9899633)
Supplement: NIHMS1867137-supplement-1.pdf [file NIHMS1867137-supplement-1.pdf]

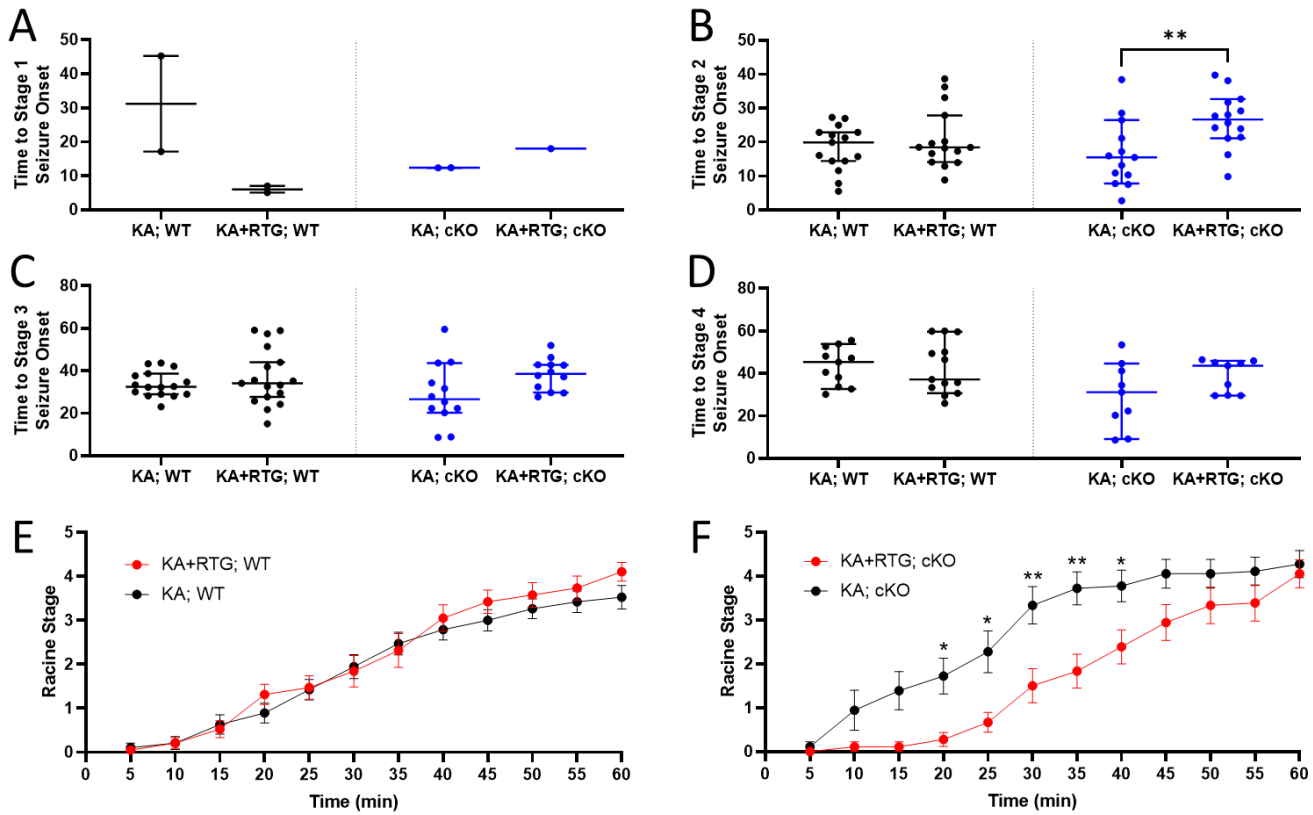

**Figure S1. Progression through Racine Scale Stages with Kainic Acid administration in WT vs cKO.** (A-D) Comparison between KA with and without RTG across Racine Stage 1-4. cKO but not WT mice had an increased latency to Stage 2 onset after RTG administration (\*\* $p < 0.01$ , Kruskal-Wallis test with Dunn's post-hoc testing); (E) No difference in Racine Stage at any time point between RTG and saline; (F) Significantly reduced Racine Stage between 20-40 minutes after KA administration in cKO mice pre-treated with RTG (\* $p < 0.05$ , \*\* $p < 0.01$ , 2-way ANOVA with post-hoc Holm-Sidak tests).

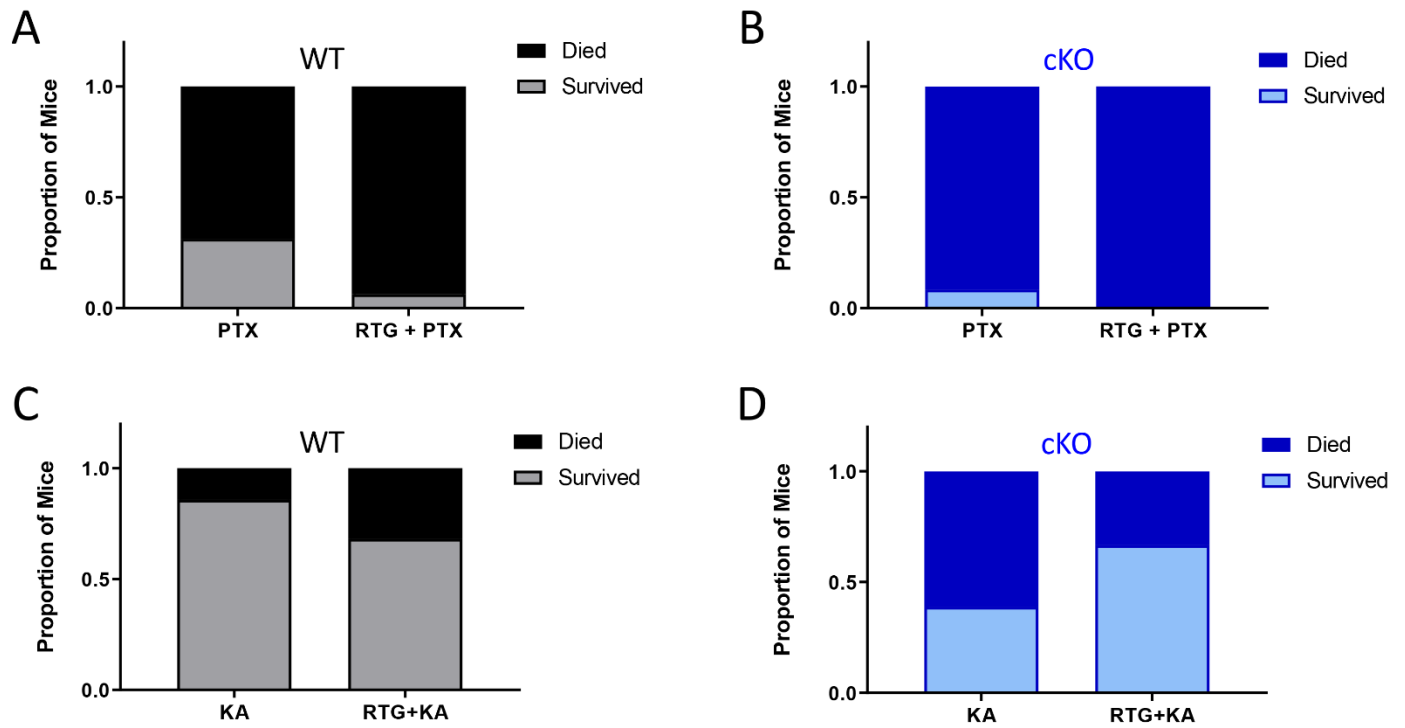

**Figure S2. No change in seizure-induced mortality with RTG for cKO mice.** Mortality following PTX-induced seizures was not significantly altered with RTG treatment in either (A) WT (n=16, 16) or (B) cKO (n=12, 14) mice. Mortality following KA-induced seizures was not significantly altered with RTG treatment in either (C) WT (n=21, 22) or (D) cKO (n=18, 18) mice (Chi-square test,  $p > 0.05$ ).

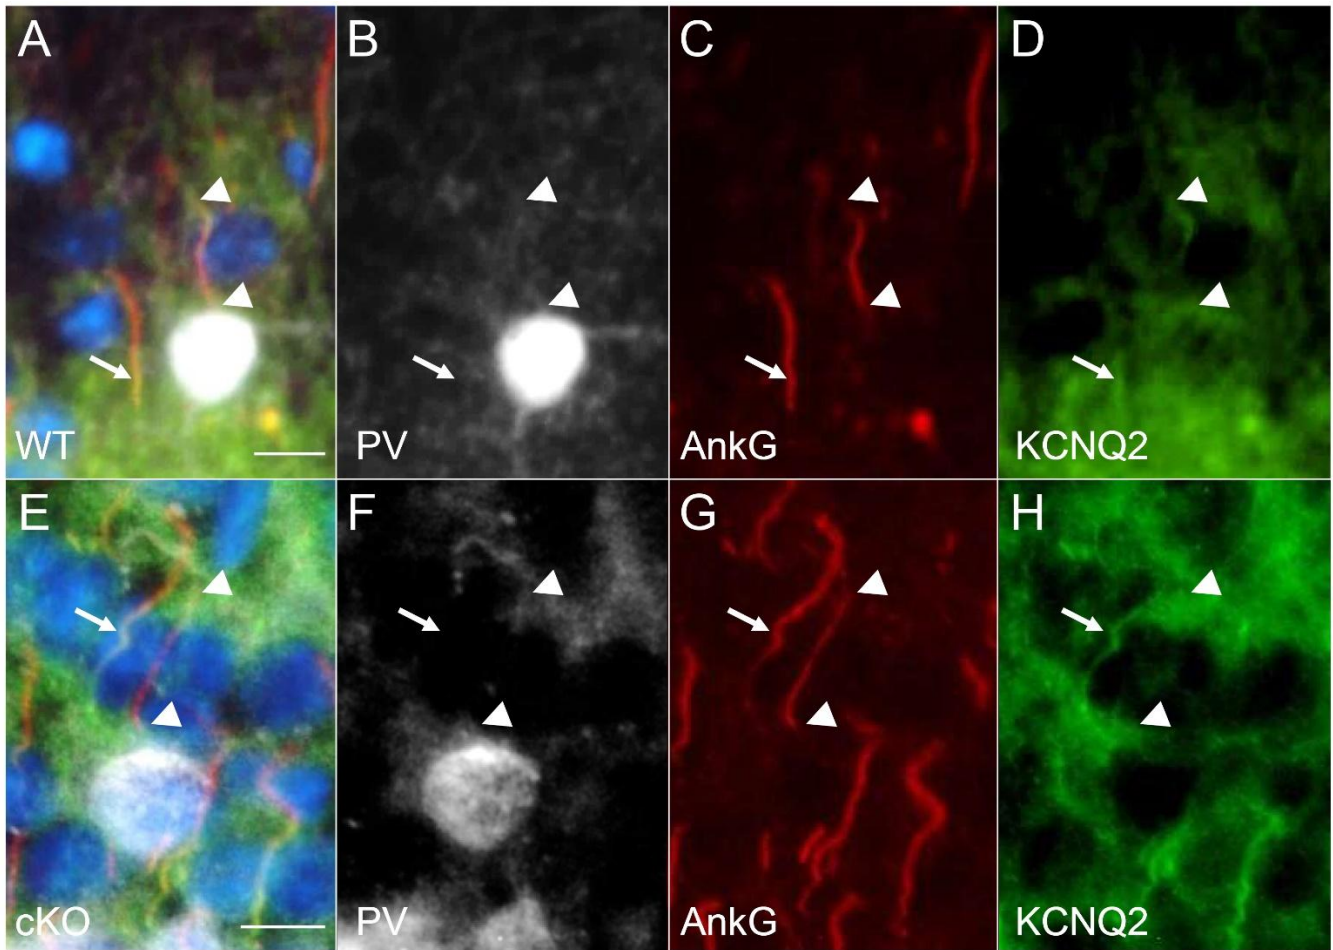

**Figure S3. Selective deletion of KCNQ2 from cortical PV-IN in cKO mice.** (A-D) In WT mice, KCNQ2 (green) was co-expressed with anti-AnkG (red) at the distal axon initial segment (AIS) of PV-IN (TdTomato – pseudocolored in white), seen here in Layer 2 of the neocortex (arrowheads) as well as non-PV-IN (arrow). (E-H) In cKO mice, KCNQ2 was no longer co-expressed with AnkG in PV-INs (arrowheads) but remained evident in the AIS of non-PV-INs (arrow); bar=10  $\mu$ m.

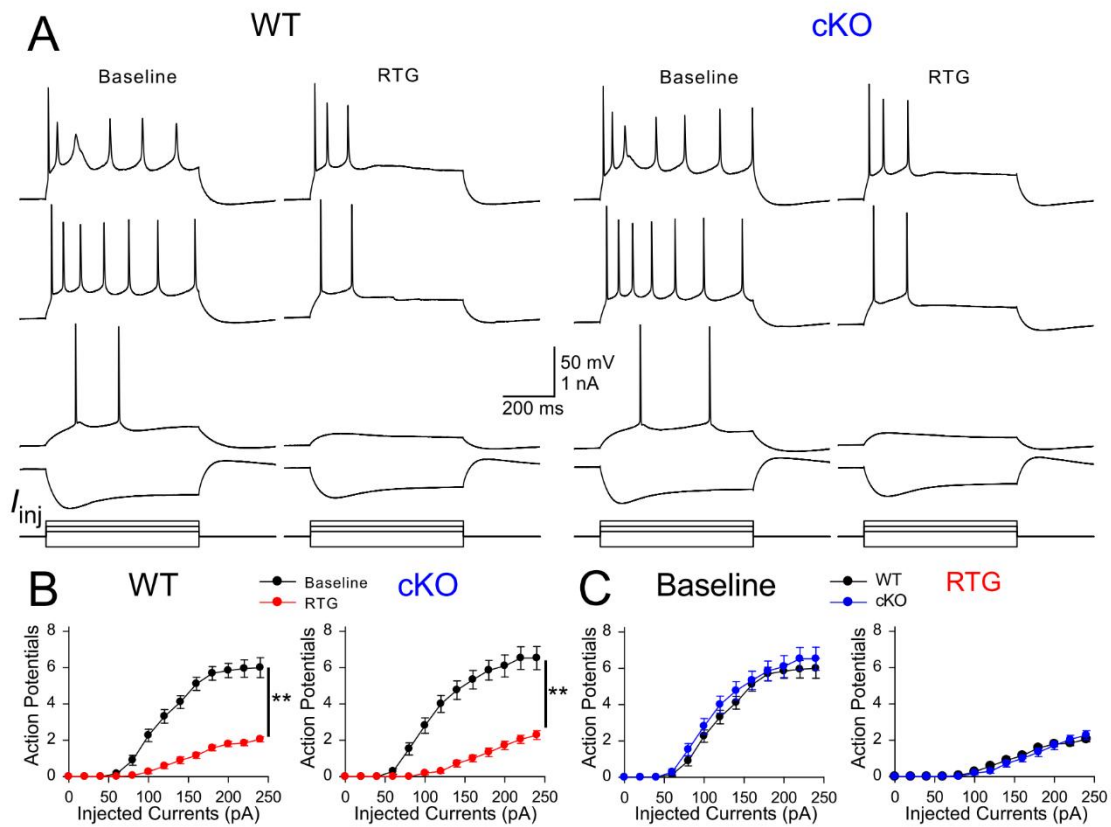

**Figure S4. Effects of RTG on the excitability of hippocampal CA1-PCs *in vitro*.** (A) Representative membrane voltage responses to different current steps in CA1-PCs from WT (left) and cKO (right) before and after 10  $\mu$ M RTG treatment. (B) RTG was effective in suppressing APs in WT PCs (left,  $n=19$ ,  $**p<0.01$  with two-way ANOVA) and in cKO PCs (right,  $n=21$ ,  $**p<0.01$  with two-way ANOVA). (C) *Kcng2* conditional knock-out from PV-INs did not significantly change AP-I curve of CA1-PCs at baseline (left). RTG induced a similar degree of suppression on the excitability of CA1-PCs from WT and cKO mice (right).

**Table: Active and Passive Membrane Properties of CA1 PV-INs and CA1-PCs in WT and cKO.**

| Cell Type             | WT PV-INs      |                   | cKO PV-INs     |                   | CA1-PC in WT  |                  | cKO CA1-PC in cKO |                  |
|-----------------------|----------------|-------------------|----------------|-------------------|---------------|------------------|-------------------|------------------|
| Treatment             | Baseline       | RTG               | Baseline       | RTG               | Baseline      | RTG              | Baseline          | RTG              |
| Rheobase (pA)         | 135.79 ± 19.68 | 216.84 ± 24.00 ** | 134.44 ± 16.31 | 177.78 ± 17.10 ** | 90.53 ± 4.15  | 133.68 ± 7.18 ** | 88.57 ± 5.08      | 152.38 ± 8.34 ** |
| Input Resistance (MΩ) | 159.36 ± 19.90 | 119.25 ± 14.35 ** | 162.54 ± 14.97 | 121.35 ± 10.48 ** | 144.85 ± 5.73 | 114.95 ± 5.02 ** | 143.80 ± 6.71     | 108.74 ± 5.56 ** |
| RMP (mV)              | -60.36 ± 1.04  | -66.11 ± 1.07 **  | -60.21 ± 0.89  | -63.22 ± 0.96 **  | -70.34 ± 0.74 | -69.15 ± 0.56    | -69.44 ± 0.70     | -69.31 ± 0.76    |
| AP Threshold (mV)     | -36.69 ± 0.86  | -37.80 ± 0.96     | -35.93 ± 0.80  | -35.86 ± 0.99     | -37.01 ± 1.73 | -36.34 ± 1.93    | -39.56 ± 1.83     | -38.89 ± 1.81    |
| AP Amplitude (mV)     | 66.62 ± 1.45   | 69.70 ± 1.50 **   | 66.16 ± 1.14   | 65.66 ± 1.15      | 88.12 ± 2.43  | 85.43 ± 2.81 **  | 90.75 ± 1.80      | 88.65 ± 1.71 **  |
| AHP (mV)              | 24.06 ± 0.83   | 21.83 ± 0.87 **   | 24.24 ± 0.60   | 22.08 ± 0.67 **   | 10.05 ± 1.66  | 10.09 ± 1.60     | 10.01 ± 1.21      | 9.94 ± 1.23      |
| AP Half width (ms)    | 0.61 ± 0.02    | 0.57 ± 0.02 **    | 0.58 ± 0.02    | 0.56 ± 0.02       | 2.07 ± 0.04   | 1.99 ± 0.04 **   | 2.00 ± 0.05       | 1.93 ± 0.04 **   |

AHP: afterhyperpolarization, AP: action potential, RMP: resting membrane potential. \*\*  $p < 0.01$  RTG vs Baseline with Two-way Repeated Measures ANOVA. Genotype X Treatment interaction on rheobase of PV-INs:  $F=4.30$ ,  $p < 0.05$ ; interaction on RMP of PV-INs:  $F=4.3$ ,  $p < 0.05$ ; interaction on AP amplitude of PV-INs:  $F=5.2$ ,  $p < 0.05$ ; interaction on AP half width of PV-INs:  $F=4.7$ ,  $p < 0.05$ ; interaction on rheobase of CA1-PCs,  $F=4.5$ ,  $p < 0.05$ .
